# Supplementary material for: Health Seeking Behaviour Among Mothers and Caregivers of Under Five Children in Ilorin Metropolis
Source: Research Square preprint supplement (doi:10.21203/rs.3.rs-7535162/v1), 2025-11-05
Supplement: Supplementary file 1 [file 58045689e0cedf6e31b98d65.docx]

**HEALTH SEEKING BEHAVIOUR AMONG MOTHERS AND CAREGIVERS OF UNDER FIVE CHILDREN IN ILORIN METROPOLIS, KWARA STATE.**

Good day sir/ma, please we are medical students from the University Of Ilorin carrying out a study to determine health seeking behaviors among mothers and caregivers of under-five children in Ilorin. We will like you to please answer the questions genuinely. Thank you for your participation.

**SECTION A: DEMOGRAPHIC INFORMATION**

1. Age……………………. (years)
2. Father’s Education Level

None [ ] Quranic [ ] Primary [ ] Secondary [ ] Tertiary [ ]

3. Mother Education Level

None [ ] Quranic [ ] Primary [ ] Secondary [ ] Tertiary [ ]

1. Father’s Occupation …………………………….
2. Mother Occupation …………………………….
3. Household income ………………………………… (monthly in Naira)
4. Number of children under 5years ………………………………………
5. Did you register for antenatal care in your last pregnancy? Yes [ ] No [ ]
6. If yes where? Public health facility [ ] Private health facility [ ]

Faith based facility [ ] Home [ ] Others (specify) ………………………….

1. Where did you give birth? Public health facility [ ] Private health facility [ ]

Faith based facility [ ] Home [ ] Others (specify) ………………………….…

1. Are you registered under health insurance scheme Yes [ ] No [ ]
2. If yes, how often do you use it in a year ……………………………………………….
3. How many times has your child(ren) fallen sick in the last 6 months? …………..…

**SECTION B: HEALTH SEEKING BEHAVIOUR**

1. Where do you usually seek healthcare for your child(ren) when sick?

Public health facility [ ] Private health facility [ ]

Faith based facility [ ] Home [ ] Others (specify) ………………………….

1. How often do you seek healthcare for your child(ren) when they have fever?

Never [ ] Sometimes [ ] All the time [ ]

1. How often do you seek healthcare for your child(ren) when they have diarrheal diseases?

Never [ ] Sometimes [ ] All the time [ ]

1. How often do you seek healthcare for your child(ren) when they have acute respiratory infection?

Never [ ] Sometimes [ ] All the time [ ]

1. How often do you seek healthcare for your child(ren) when they have trauma/injuries?

Never [ ] Sometimes [ ] All the time [ ]

1. Do you go to the hospital immediately your child is sick? Yes [ ] No [ ]
2. If there is a delay, what is the duration? Within 24 hours [ ] between 24-48 hours [ ] after 48 hours [ ].
3. If there is a delay, what is/are the reason for the delay?

Looking for money [ ] Waiting for father’s consent [ ] Lack of transport [ ]

Others (specify) .................................................................................................

…………………………………………………………………………………………………………

1. How do you usually know when your child(ren) need medical attention?
2. ………………………………………………………………………………………….
3. ………………………………………………………………………………………….
4. ………………………………………………………………………………………
5. What factors determine when you take your child to the hospital
6. ………………………………………………………………………………………….
7. ………………………………………………………………………………………….
8. ……………………………………………………………………………………
9. If the price of drugs reduces, will you visit health facility more? Yes [ ] No [ ]
10. Before the recent increase in cost of healthcare, do you take your child to the hospital as the need arises Yes, always [ ] Yes sometimes [ ] Rarely [ ]
11. After the recent increase in cost of healthcare, do you take your child to the hospital as the need arises Yes, always [ ] Yes sometimes [ ] Rarely [ ]

**SECTION C: HEALTHCARE EXPERIENCES**

1. Have you encountered any challenges when seeking healthcare for your child(ren)?

Yes [ ] No [ ]

1. If yes to Q23, what are the challenges?
2. ……………………………………………………………………………………….
3. ……………………………………………………………………………………….
4. ……………………………………………………………………………………….
5. How satisfied are you with the healthcare services you receive for your child(ren)?

Very satisfied [ ] Satisfied [ ] Undecided [ ] Dissatisfied [ ] Very dissatisfied [ ]

1. Have you ever been referred to a specialist or higher-level healthcare facility for your child(ren)’s care? Yes [ ] No [ ]
